# Supplementary material for: New reactions and processes for the efficient synthesis of a HCV NS5b prodrug
Source: Royal Society of Chemistry journal article supplement (doi:10.1039/c8gc00102b), 2018-01-01
Supplement: c8gc00102b1.pdf [file c8gc00102b1.pdf]

## An Efficient and Scalable Route to an HCV NS5b Cyclic Nucleoside Prodrug through the Discovery of New Reactions and Processes

Robert K. Orr\*, Jamie M. McCabe Dunn\*, Andrew Nolting, Alan M. Hyde, Eric R. Ashley, Joseph Leone, Eric Sirota, Jon A. Jurica, Andrew Gibson, Chris Wise, Steven Oliver, and Rebecca T. Ruck

Department of Process Research & Development, Merck & Co., Inc., Rahway, NJ 07065, USA

Table 1. PMI's from Kjell et al paper<sup>i</sup> compared to Merck's predicted PMI calculated from our complexity model<sup>ii</sup>

| Name          | Structure                                                                                         | PMI <sup>i</sup> | Predicted PMI from Complexity <sup>ii</sup> |
|---------------|---------------------------------------------------------------------------------------------------|------------------|---------------------------------------------|
| Kjell Paper-1 | 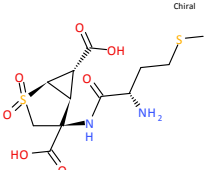 <p>Chiral</p>   | 1350             | 616                                         |
| Kjell Paper-2 |  <p>Chiral</p>  | 366              | 242                                         |
| Kjell Paper-3 |                | 268              | 242                                         |
| Kjell_Paper-4 |  <p>Chiral</p> | 439              | 590                                         |
| Kjell_Paper-5 |  <p>Chiral</p> | 86               | 215                                         |

|                |                                                                                                   |       |     |
|----------------|---------------------------------------------------------------------------------------------------|-------|-----|
| Kjell_Paper-6  | 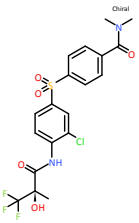 <p>Chiral</p>   | 428   | 269 |
| Kjell_Paper-7  |  <p>Chiral</p>   | 588   | 322 |
| Kjell_Paper-8  |  <p>Chiral</p>   | 18377 | 296 |
| Kjell_Paper-9  |  <p>Chiral</p>  | 223   | 215 |
| Kjell_Paper-10 |  <p>Chiral</p> | 196   | 215 |
| Kjell_Paper-11 |  <p>Chiral</p> | 75    | 162 |
| Kjell_Paper-12 |  <p>Chiral</p> | 125   | 82  |

|                |                                                                                                                             |     |     |
|----------------|-----------------------------------------------------------------------------------------------------------------------------|-----|-----|
| Kjell_Paper-13 | <p style="text-align: center;">Chiral</p> 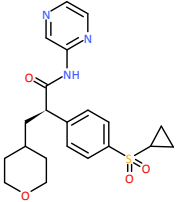 | 495 | 269 |
| Kjell_Paper-14 |                                            | 125 | 215 |
| Kjell_Paper-15 | <p style="text-align: center;">Chiral</p>  | 242 | 242 |

<sup>i</sup> D. P. Kjell, I. A. Watson, C. N. Wolfe, J. T. Spitler, *Org. Process. Res. Dev.* **2013**, *17*, 169–174.

<sup>ii</sup> R. P. Sheridan, N. Zorn, E. C. Sherer, L. Campeau, C. Z. Chang, J. Cumming, M. L. Maddess, P. G. Nantermet, C. J. Sinz and P. D. O. Shea, *J. Chem. Inf. Model.* 2014, **54**, 1604–1616
